# Supplementary material for: FBXO22 degrades nuclear PTEN to promote tumorigenesis
Source: PubMed Central journal article supplement (PMC7136256; doi:10.1038/s41467-020-15578-1), 2020-04-06
Supplement: 41467_2020_15578_MOESM3_ESM.pdf [file 41467_2020_15578_MOESM3_ESM.pdf]

## **Description of Additional Supplementary Files**

File Name: Supplementary Data 1

Description: List of PTEN interacting proteins

File Name: Supplementary Data 2

Description: Information on samples of colorectal cancer patients

File Name: Supplementary Data 3

Description: Information on tissue microarray of colon cancer patients
